# Supplementary material for: Breakfast Consumption in the UK: Patterns, Nutrient Intake and Diet Quality. A Study from the International Breakfast Research Initiative Group
Source: PubMed Central journal article supplement (PMC6115898; doi:10.3390/nu10080999), 2018-07-30
Supplement: nutrients-10-00999-s001.pdf [file nutrients-10-00999-s001.pdf]

## Supplementary Material

**Table S1.** Contribution (%) of food groups to intakes of key nutrients at breakfast in children and adolescents aged 5-17 years.

|                                      | % of consumers | Energy      | NMES        | AOAC fibre  | Saturated fat | Sodium      | Vitamin B12 | Vitamin D   | Folate      | Calcium     | Iron        | Potassium   | Magnesium   |
|--------------------------------------|----------------|-------------|-------------|-------------|---------------|-------------|-------------|-------------|-------------|-------------|-------------|-------------|-------------|
| Tea, coffee and water                | 62             | 0.1         | 0.0         | 0.0         | 0.1           | 0.1         | 0.1         | 0.0         | 0.9         | 0.1         | 0.1         | 1.8         | 1.2         |
| Semi skimmed milk                    | 61             | 9.6         | 0.0         | 0.0         | 22.0          | 10.8        | 40.0        | 0.1         | 8.3         | 31.0        | 0.0         | 22.2        | 15.1        |
| Other breakfast cereals              | 48             | 11.6        | 17.3        | 12.9        | 2.9           | 12.2        | 8.0         | 19.5        | 21.7        | 5.7         | 26.3        | 4.1         | 8.2         |
| White bread                          | 47             | 9.8         | 0.4         | 15.8        | 1.9           | 15.1        | 0.0         | 0.1         | 8.1         | 12.0        | 11.4        | 5.6         | 8.7         |
| Sugar preserves and sweet spreads    | 45             | 3.8         | 17.7        | 0.6         | 1.4           | 0.3         | 0.2         | 0.0         | 0.2         | 0.5         | 1.3         | 0.8         | 1.0         |
| High fibre breakfast cereals         | 45             | 11.1        | 11.1        | 24.1        | 3.6           | 9.4         | 5.0         | 7.5         | 19.2        | 5.8         | 26.3        | 7.6         | 14.1        |
| Fruit                                | 39             | 4.0         | 0.9         | 11.5        | 0.6           | 0.5         | 0.0         | 0.0         | 3.9         | 1.4         | 2.6         | 8.5         | 6.3         |
| Reduced fat spread                   | 32             | 3.1         | 0.0         | 0.0         | 8.6           | 2.9         | 2.1         | 21.3        | 2.3         | 0.2         | 0.1         | 0.3         | 0.1         |
| Fruit juice                          | 32             | 4.0         | 15.7        | 1.8         | 0.4           | 1.0         | 0.0         | 0.0         | 7.2         | 2.0         | 2.6         | 8.8         | 5.5         |
| Biscuits                             | 25             | 4.5         | 6.2         | 4.3         | 6.3           | 3.5         | 1.1         | 1.1         | 2.2         | 2.5         | 4.4         | 2.4         | 3.4         |
| Whole milk                           | 25             | 5.5         | 0.0         | 0.0         | 12.9          | 4.6         | 15.8        | 0.0         | 3.7         | 12.9        | 0.0         | 9.5         | 6.6         |
| Soft drinks low calorie              | 23             | 0.3         | 1.4         | 0.0         | 0.0           | 1.2         | 0.3         | 0.1         | 0.5         | 0.5         | 0.1         | 0.9         | 0.6         |
| Soft drinks not low calorie          | 22             | 2.8         | 10.2        | 0.1         | 0.0           | 1.0         | 0.9         | 0.0         | 0.6         | 1.0         | 0.3         | 1.3         | 1.5         |
| Buns, cakes, pastries & fruit pies   | 18             | 3.9         | 3.7         | 3.9         | 4.8           | 4.5         | 1.2         | 5.5         | 2.3         | 2.3         | 3.1         | 2.0         | 2.4         |
| Miscellaneous                        | 18             | 0.9         | 2.7         | 0.6         | 0.7           | 1.9         | 1.0         | 0.9         | 1.9         | 0.5         | 1.3         | 1.4         | 1.6         |
| Butter                               | 15             | 1.9         | 0.0         | 0.0         | 6.7           | 1.2         | 0.9         | 4.9         | 0.0         | 0.1         | 0.0         | 0.1         | 0.1         |
| Eggs and egg dishes                  | 15             | 1.7         | 0.0         | 0.0         | 2.7           | 1.6         | 5.5         | 11.1        | 2.3         | 1.2         | 2.7         | 1.2         | 1.1         |
| Bacon and ham                        | 14             | 1.4         | 0.2         | 0.0         | 2.7           | 4.4         | 2.4         | 4.6         | 0.1         | 0.1         | 0.8         | 1.8         | 1.2         |
| Brown granary and wheatgerm<br>bread | 14             | 2.5         | 0.0         | 5.5         | 0.5           | 3.8         | 0.0         | 0.0         | 2.6         | 3.7         | 3.8         | 2.0         | 3.7         |
| Wholemeal bread                      | 10             | 1.7         | 0.0         | 3.9         | 0.4           | 2.8         | 0.0         | 0.0         | 1.7         | 1.6         | 2.4         | 1.5         | 2.8         |
| <b>Total</b>                         |                | <b>84.1</b> | <b>87.7</b> | <b>85.0</b> | <b>79.3</b>   | <b>82.7</b> | <b>84.4</b> | <b>76.6</b> | <b>88.8</b> | <b>84.9</b> | <b>89.7</b> | <b>82.1</b> | <b>84.1</b> |

Miscellaneous food group includes: Savory sauces, pickles, gravies & condiments; beverages dry weight; Nutrition powders & drinks; Soup manufactured/retail; Soup homemade. Abbreviations: NMES non-milk extrinsic sugars; AOAC American Association of Analytical Chemists.

**Table S2.** Contribution (%) of food groups to intakes of key nutrients at breakfast in adults and older adults aged 18 years +.

|                                    | % of consumers | Energy | NMES | AOAC fibre | Saturated fat | Sodium | Vitamin B12 | Vitamin D | Folate | Calcium | Iron | Potassium | Magnesium |
|------------------------------------|----------------|--------|------|------------|---------------|--------|-------------|-----------|--------|---------|------|-----------|-----------|
| Tea coffee and water               | 96             | 1.0    | 0.6  | 0.0        | 1.0           | 1.2    | 1.3         | 0.1       | 6.1    | 2.2     | 4.3  | 15.3      | 11.2      |
| Semi skimmed milk                  | 67             | 9.7    | 0.0  | 0.0        | 21.9          | 12.4   | 41.9        | 0.6       | 9.6    | 32.1    | 0.1  | 18.5      | 12.5      |
| Sugar preserves and sweet spreads  | 57             | 7.5    | 36.6 | 0.5        | 0.2           | 0.5    | 0.0         | 0.1       | 0.5    | 1.9     | 0.5  | 0.5       | 0.5       |
| High fibre breakfast cereals       | 42             | 12.1   | 11.3 | 24.1       | 5.6           | 9.5    | 4.4         | 8.1       | 16.3   | 5.9     | 23.6 | 8.2       | 14.9      |
| Fruit                              | 42             | 5.8    | 2.3  | 12.1       | 1.1           | 0.8    | 0.1         | 0.0       | 5.7    | 2.0     | 4.5  | 10.7      | 8.0       |
| White bread                        | 39             | 9.1    | 0.3  | 16.0       | 1.7           | 13.5   | 0.1         | 0.3       | 8.1    | 11.1    | 11.9 | 4.9       | 7.6       |
| Reduced fat spread                 | 31             | 3.5    | 0.0  | 0.0        | 9.7           | 3.2    | 1.9         | 21.3      | 2.4    | 0.2     | 0.1  | 0.3       | 0.1       |
| Other breakfast cereals            | 28             | 6.6    | 9.3  | 7.8        | 1.6           | 7.3    | 4.8         | 12.3      | 12.8   | 1.4     | 15.0 | 1.9       | 3.7       |
| Biscuits                           | 23             | 3.9    | 6.3  | 4.5        | 5.4           | 3.5    | 0.4         | 1.3       | 1.3    | 1.7     | 3.7  | 1.6       | 2.5       |
| Eggs and egg dishes                | 20             | 2.7    | 0.0  | 0.0        | 4.2           | 2.2    | 8.2         | 15.7      | 3.9    | 1.8     | 4.7  | 1.7       | 1.7       |
| Fruit juice                        | 20             | 2.4    | 10.3 | 1.2        | 0.2           | 0.9    | 0.0         | 0.0       | 4.9    | 1.3     | 2.1  | 4.7       | 3.0       |
| Butter                             | 20             | 2.9    | 0.0  | 0.0        | 9.7           | 1.8    | 0.9         | 7.3       | 0.0    | 0.1     | 0.0  | 0.1       | 0.1       |
| Miscellaneous                      | 18             | 1.1    | 2.4  | 0.9        | 1.1           | 2.8    | 1.4         | 1.1       | 2.3    | 0.9     | 1.5  | 1.5       | 1.5       |
| Wholemeal bread                    | 18             | 3.6    | 0.1  | 8.1        | 1.0           | 5.9    | 0.0         | 0.0       | 3.7    | 3.2     | 5.5  | 2.9       | 5.4       |
| Whole milk                         | 18             | 3.1    | 0.0  | 0.0        | 7.4           | 3.1    | 10.6        | 0.1       | 2.9    | 8.3     | 0.0  | 5.3       | 3.7       |
| Bacon and ham                      | 17             | 1.9    | 0.2  | 0.0        | 3.3           | 5.7    | 2.3         | 4.7       | 0.1    | 0.1     | 1.0  | 2.1       | 1.4       |
| Brown granary and wheatgerm bread  | 16             | 3.4    | 0.1  | 6.9        | 0.8           | 5.0    | 0.0         | 0.0       | 3.9    | 4.7     | 5.1  | 2.3       | 4.3       |
| Buns, cakes, pastries & fruit pies | 13             | 3.0    | 3.6  | 3.0        | 3.6           | 3.3    | 0.8         | 3.4       | 1.7    | 1.7     | 2.7  | 1.4       | 1.6       |
| Soft drinks not low calorie        | 10             | 1.5    | 5.5  | 0.0        | 0.0           | 0.5    | 0.5         | 0.0       | 0.3    | 0.5     | 0.2  | 0.5       | 0.7       |
| Soft drinks low calorie            | 8              | 0.1    | 0.7  | 0.0        | 0.0           | 0.4    | 0.1         | 0.0       | 0.1    | 0.4     | 0.0  | 0.3       | 0.3       |
| <b>Total</b>                       |                | 83.7   | 89.1 | 85.3       | 78.6          | 82.3   | 78.4        | 76.3      | 80.3   | 78.2    | 83.7 | 69.2      | 73.4      |

Miscellaneous food group includes: Savory sauces, pickles, gravies & condiments; beverages dry weight; Nutrition powders & drinks; Soup manufactured/retail; Soup homemade. Abbreviations: NMES non-milk extrinsic sugars; AOAC American Association of Analytical Chemists.
